# Supplementary material for: Preparation of bimetal–polydopamine organic frameworks with core–shell structure and their application in HER2 detection
Source: Royal Society of Chemistry journal article supplement (doi:10.1039/d1an01759d), 2021-11-15
Supplement: d1an01759d1.pdf [file d1an01759d1.pdf]

**Preparation of bimetal-polydopamine organic frameworks with core-shell  
structure and its application in HER2 detection**

Yawen Wu<sup>a†</sup>, Xiaolong Chen<sup>a†</sup>, Lu peng<sup>b</sup>, Changjun Hou<sup>a,c</sup>, Jiawei Li<sup>a,b\*</sup>, Mei Yang<sup>a\*</sup>,

Danqun Huo<sup>a,d\*</sup>

<sup>a</sup> Key Laboratory for Biorheological Science and Technology of Ministry of Education, State and Local Joint Engineering Laboratory for Vascular Implants, Bioengineering College of Chongqing University, Chongqing 400044, PR China.

<sup>b</sup> Chongqing University Three Gorges Hospital, Chongqing, 404000, PR China.

<sup>c</sup> National Facility for Translational Medicine, Shanghai Jiao Tong University, Shanghai, 200240, PR, China.

<sup>d</sup> Chongqing Key Laboratory of Bio-perception & Intelligent Information Processing, School of Microelectronics and Communication Engineering, Chongqing University, Chongqing, 400044, PR China.

<sup>†</sup> Yawen Wu and Xiaolong Chen contributed to this work equally.

Interest: There were no competing interests in this article.

\* Corresponding author. Tel.: +86 23 6511 2673; fax: +86 23 6510 2507. E-mail addresses: LI\_JIAWEI\_1993@163.com (J. Li); yangmei@cqu.edu.cn (M. Yang); huodq@cqu.edu.cn (D. Huo).

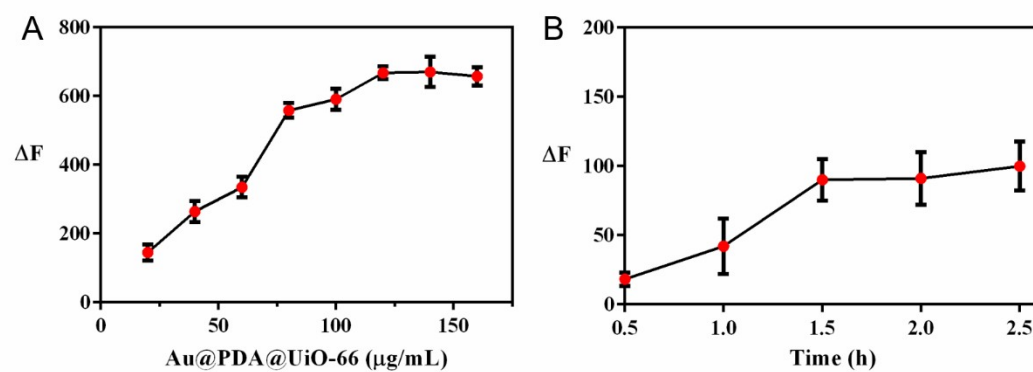

**Figure S1** Optimization of the proposed fluorescence biosensor. (A) Optimization of the Au@PDA@UiO-66; (B) Optimization of the incubation time between the HER2-Cy5-Apt and HER2.
